# Supplementary material
Source: PubMed Central journal article supplement (PMC4857451)
Supplement: 000225.pdf [file 000225.pdf]

1 **Supplementary information**

2 Dynamics of Virus Shedding and Antibody Responses in Influenza A Virus–Infected Feral  
3 Swine

4

5 Hailiang Sun,<sup>a,†</sup> Fred L. Cunningham,<sup>b,†</sup> Jillian Harris,<sup>a</sup> Yifei Xu,<sup>a</sup> Li-Ping Long,<sup>a</sup> Katie Hanson-  
6 Dorr,<sup>b</sup> John A. Baroch,<sup>c</sup> Paul Fioranelli,<sup>b</sup> Mark W. Lutman,<sup>d</sup> Tao Li,<sup>e</sup> Kerri Pedersen,<sup>d</sup> Brandon  
7 S. Schmit,<sup>c</sup> Jim Cooley,<sup>f</sup> Xiaoxu Lin,<sup>e</sup> Richard G. Jarman,<sup>e</sup> Thomas J. DeLiberto,<sup>c</sup> and Xiu-Feng  
8 Wan<sup>a#</sup>

9

10 Department of Basic Sciences, College of Veterinary Medicine, Mississippi State University,  
11 Mississippi State, Mississippi, the United States<sup>a</sup>; Mississippi Field Station, National Wildlife  
12 Research Center, Wildlife Services, Animal and Plant Health Inspection Service, US Department  
13 of Agriculture, Mississippi State, Mississippi, the United States<sup>b</sup>; National Wildlife Research  
14 Center, Wildlife Services, Animal and Plant Health Inspection Service, US Department of  
15 Agriculture, Fort Collins, Colorado, the United States<sup>c</sup>; US Department of Agriculture, Animal  
16 and Plant Health Inspection Service, Wildlife Services, Fort Collins, Colorado, the United States<sup>d</sup>;  
17 Viral Diseases Branch, Walter Reed Army Institute of Research, Silver Spring, Maryland, the  
18 United States<sup>e</sup>; Department of Pathobiology and Population Medicine, College of Veterinary  
19 Medicine, Mississippi State University, Mississippi State, Mississippi, the United States<sup>f</sup>

20

21 Running Head: Responses to Influenza A Virus Infection in Feral Swine

22

23 †H.S. and F.L.C. contributed equally to this work.

24

25 #Address correspondence to Xiu-Feng Wan, [wan@cvm.msstate.edu](mailto:wan@cvm.msstate.edu).

26

27

28

29

30

31

32

33

34

35

36

37

38

39

40 **Supplementary Table 1.** Nucleotide polymorphisms in the coding regions among sequences of  
 41 wild-type virus used for inoculation and among virus isolates recovered from sentinel swine in a  
 42 study of the dynamics of virus shedding and antibody responses during influenza A virus  
 43 infection in feral swine

| Gene | Position <sup>a</sup> | Nucleotide <sup>c</sup> , by virus |              |                |             |
|------|-----------------------|------------------------------------|--------------|----------------|-------------|
|      |                       | P1D8 <sup>b</sup>                  | P5D8         | P10D8          | Wild-type   |
| PB2  | 792                   | T                                  | T            | T/A (1/32)     | T/A (36/25) |
| PB2  | 822                   | C/T (383/112)                      | C            | C              | C           |
| PB2  | 882                   | C                                  | C/T (47/58)  | C              | C           |
| PB2  | 1125                  | C                                  | C            | C/T (276/83)   | C           |
| PB1  | 1062                  | C                                  | C            | C/T (1004/469) | C           |
| PB1  | 1749                  | G                                  | G            | G/A (6/515)    | G/A (38/21) |
| PA   | 1452                  | C                                  | C/T (205/68) | C              | C           |
| HA   | 563                   | A                                  | A/G (38/19)  | A/G (22/217)   | A/G (73/42) |

44

45 <sup>a</sup>Numbering of the nucleotide was from the first nucleic acid of each gene of the influenza  
 46 viruses.

47 <sup>b</sup>Isolates P1D8, P5D8, and P10D8 were isolated from sentinel swine numbers 1, 5, and 10,  
 48 respectively, 8 days after swine in the treatment group were infected. The wild-type virus was  
 49 influenza strain A/swine/Texas/A01104013/2012(H3N2), which was used to inoculate swine in  
 50 the treatment group.

51 <sup>c</sup>Numbers in parentheses represent the number of supporting reads.

52

53 **Supplementary Table 2.** Nucleotide polymorphisms in the non-coding regions among  
 54 sequences of wild-type virus used for inoculation and among virus isolates recovered from  
 55 sentinel swine in a study of the dynamics of virus shedding and antibody responses during  
 56 influenza A virus infection in feral swine

| Gene | Position <sup>a</sup> | Nucleotide <sup>c</sup> , by virus |               |                |              |
|------|-----------------------|------------------------------------|---------------|----------------|--------------|
|      |                       | P1D8 <sup>b</sup>                  | P5D8          | P10D8          | Wild-type    |
| PB2  | 17                    | A/T (336/1377)                     | A/T (245/138) | A              | A            |
| PB2  | 2327                  | G                                  | G/T (216/80)  | G/T (739/214)  | G            |
| PB1  | 2328                  | G                                  | G/C (105/33)  | G              | G            |
| PA   | 20                    | C/T (1391/539)                     | C             | C              | C            |
| PA   | 22                    | A/G (303/1635)                     | A/G (450/132) | A/G (1892/585) | A            |
| HA   | 18                    | T                                  | T/A (11/10)   | T/A (44/25)    | T            |
| HA   | 1747                  | T/C (64/25)                        | T/C (61/73)   | T/C (240/137)  | T/C (100/55) |
| M1   | 1013                  | G/T (9/55)                         | G/T (66/66)   | G/T (225/226)  | G/T (149/81) |

57

58 <sup>a</sup>Numbering of the nucleotide was from the first nucleic acid of each gene of the influenza  
 59 viruses.

60 <sup>b</sup>Isolates P1D8, P5D8, and P10D8 were isolated from sentinel swine numbers 1, 5, and 10,  
 61 respectively, 8 days after swine in the treatment group were infected. The wild-type virus was  
 62 influenza strain A/swine/Texas/A01104013/2012(H3N2), which was used to inoculate swine in  
 63 the treatment group.

64 <sup>c</sup>Numbers in parentheses represent number of supporting reads.

65
